# Supplementary material for: Comprehensive Analysis of DNA Methylation Regulator DNA Methyltransferase (DNMT) Family and Ten-Eleven-Translocation (TET) Enzymes Family in Pan-Cancer
Source: Research Square preprint supplement (doi:10.21203/rs.3.rs-154338/v1), 2021-01-29
Supplement: Supplementary file 1 [file 8f60f1d683018d152a5bf0ed.xlsx]

## Sheet: Supplementary Table 2
	breast cancer				carcinoid				cervical cancer				colorectal cancer				endometrial cancer				glioma				head and neck cancer				liver cancer				lung cancer				lymphoma				melanoma				ovarian cancer				pancreatic cancer
protein expression gene symbol	High	Medium	Low	Not.detected	High	Medium	Low	Not.detected	High	Medium	Low	Not.detected	High	Medium	Low	Not.detected	High	Medium	Low	Not.detected	High	Medium	Low	Not.detected	High	Medium	Low	Not.detected	High	Medium	Low	Not.detected	High	Medium	Low	Not.detected	High	Medium	Low	Not.detected	High	Medium	Low	Not.detected	High	Medium	Low	Not.detected	High
DNMT1	0	3	5	3	0	0	3	1	0	3	4	5	0	5	1	5	0	2	2	8	0	1	2	9	0	3	1	0	0	0	4	8	0	1	3	8	1	2	7	2	0	0	3	9	0	1	7	4	0
TRDMT1	1	9	1	0	2	2	0	0	0	9	3	0	3	9	0	0	3	9	0	0	4	6	0	0	1	2	0	0	4	4	0	1	4	3	4	0	3	5	1	3	5	3	0	0	3	9	0	0	5
DNMT3A	11	1	0	0	1	3	0	0	9	2	0	1	10	2	0	0	6	6	0	0	6	6	0	0	4	0	0	0	5	5	1	1	2	8	1	0	6	5	1	0	8	3	1	0	8	4	0	0	7
DNMT3B	0	2	6	2	0	0	2	2	0	3	7	2	0	2	5	4	0	2	7	2	0	4	2	5	0	3	1	0	0	1	4	6	0	3	3	5	0	0	2	10	1	2	3	3	0	4	3	5	0
DNMT3L	0	0	4	8	0	0	3	1	0	3	6	1	0	2	5	3	0	0	2	8	3	4	2	0	0	0	2	2	0	1	2	8	0	5	5	2	0	2	2	7	0	4	5	3	0	0	5	5	0
DMAP1	0	4	8	0	0	0	3	1	0	0	6	6	0	0	10	2	0	0	8	4	0	2	4	4	0	1	3	0	0	1	2	9	0	0	4	8	0	0	1	11	0	0	3	8	0	1	2	9	0
TET1	NA	NA	NA	NA	NA	NA	NA	NA	NA	NA	NA	NA	NA	NA	NA	NA	NA	NA	NA	NA	NA	NA	NA	NA	NA	NA	NA	NA	NA	NA	NA	NA	NA	NA	NA	NA	NA	NA	NA	NA	NA	NA	NA	NA	NA	NA	NA	NA	NA
TET2	7	5	0	0	0	4	0	0	10	2	0	0	7	5	0	0	5	6	0	0	4	8	0	0	0	4	0	0	1	5	5	0	0	12	0	0	7	5	0	0	1	11	0	0	8	4	0	0	1
TET3	1	0	1	10	0	0	0	4	0	1	4	6	0	0	1	11	0	0	0	11	0	0	1	7	0	2	0	0	0	0	1	9	0	0	0	10	0	0	2	7	0	0	0	11	0	0	2	10	0
TET1	NA	NA	NA	NA	NA	NA	NA	NA	NA	NA	NA	NA	NA	NA	NA	NA	NA	NA	NA	NA	NA	NA	NA	NA	NA	NA	NA	NA	NA	NA	NA	NA	NA	NA	NA	NA	NA	NA	NA	NA	NA	NA	NA	NA	NA	NA	NA	NA	NA
[truncated: 31 more columns]
